# Supplementary material for: NF-YA Overexpression in Lung Cancer: LUSC
Source: MDPI journal article supplement (doi:10.3390/genes10110937), 2019-11-17

Supplementary Figure 1: Partitioning of GSE81089 data. A. Correlation plot B. PCA. C. Heatmap of signature genes expression across samples classified.

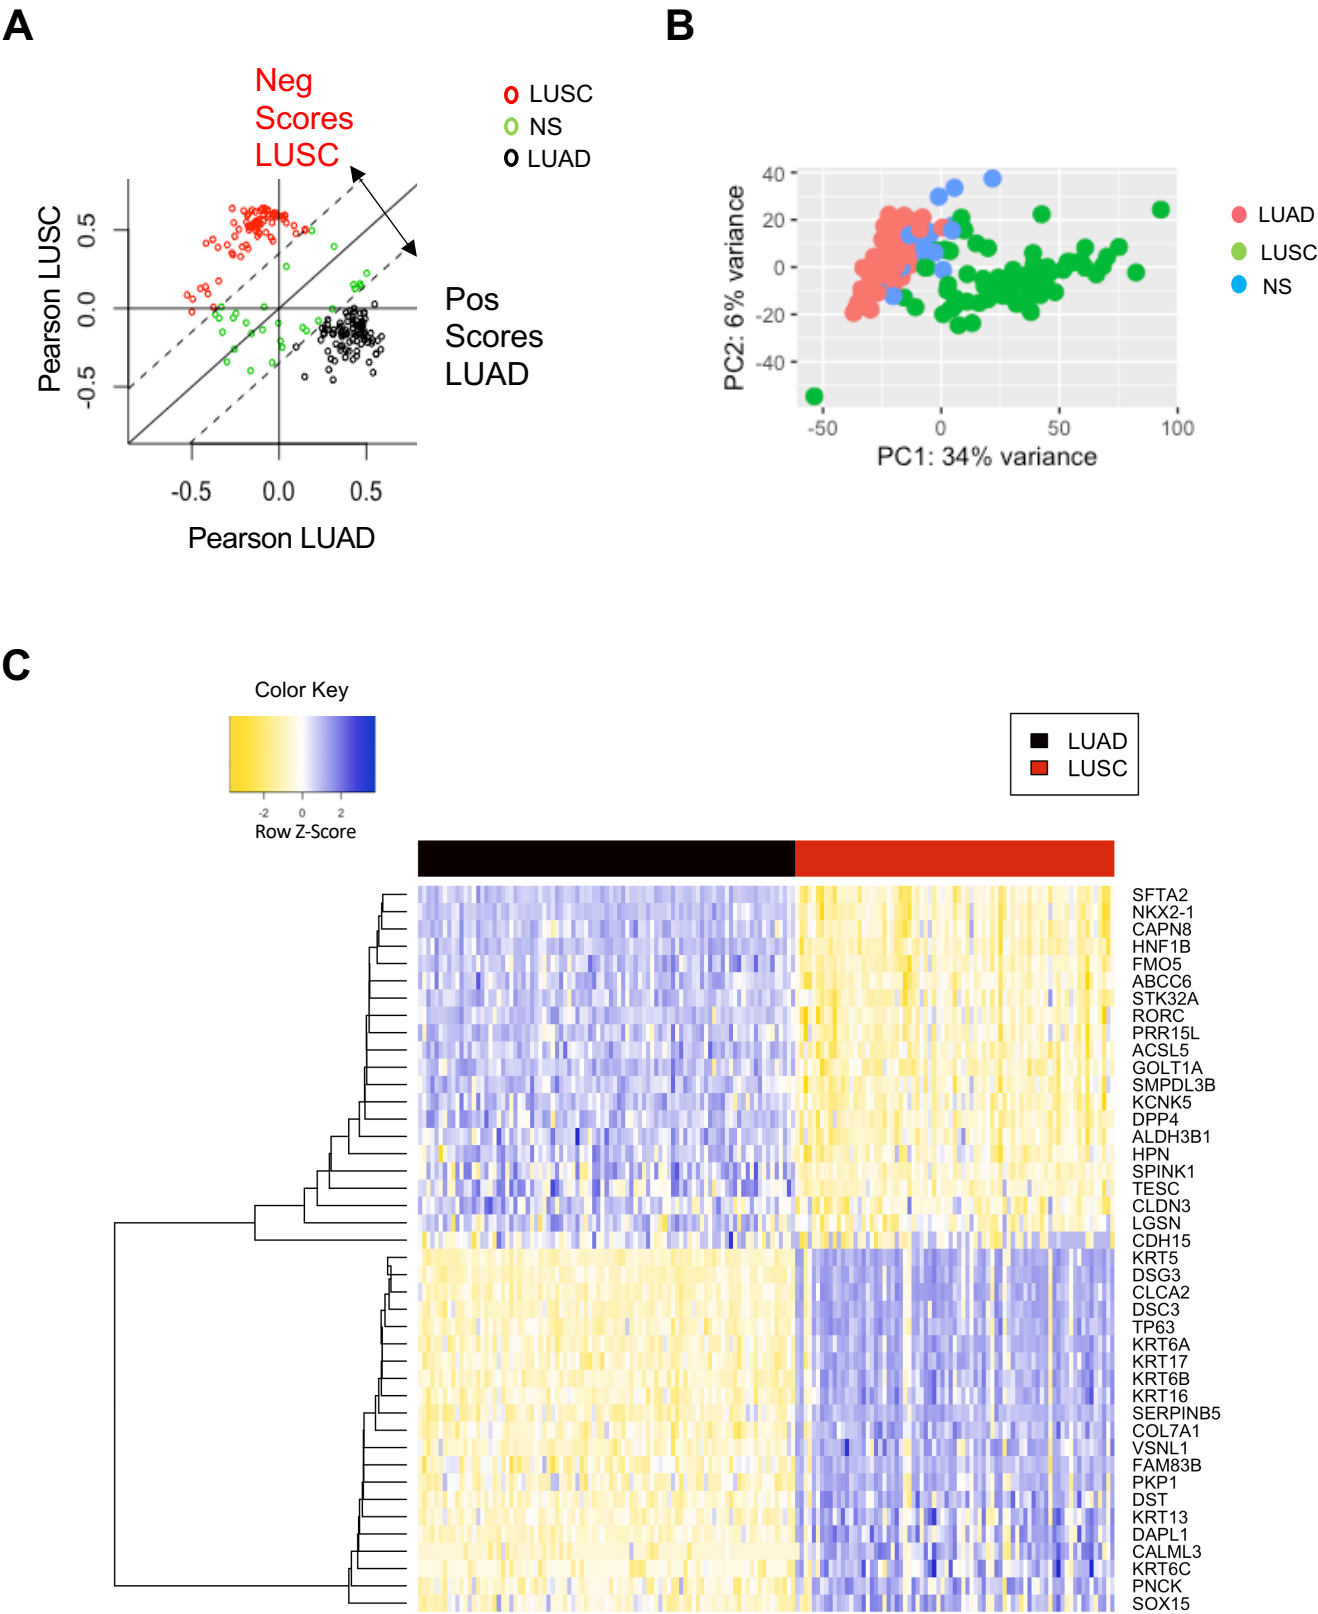

Supplementary Figure 2: Splicings of NF-YC.

NFYC

| RefSeq genes | transcript variant   | UCSC genes | assembly |
|--------------|----------------------|------------|----------|
| NM_001142588 | transcript variant 1 | uc010ojm.1 | hg19     |
| NM_001142588 | transcript variant 1 | uc001cfx.4 | hg19     |
| NM_001142588 | transcript variant 1 | uc001cge.3 | hg19     |
| NM_014223    | transcript variant 2 | uc009vwd.3 | hg19     |
| NM_014223    | transcript variant 2 | uc001cfy.4 | hg19     |
| NM_014223    | transcript variant 2 | uc001cgb.3 | hg19     |
| NM_014223    | transcript variant 2 | uc001cgd.2 | hg18*    |
| NM_001142587 | transcript variant 3 | uc001cfz.3 | hg19     |
| NM_001142589 | transcript variant 4 | uc010ojn.2 | hg19     |
| NM_001142590 | transcript variant 5 | uc001cgc.3 | hg19     |
| NM_001308114 | transcript variant 6 | -          | hg19     |
| NM_001308115 | transcript variant 7 | -          | hg19     |

NF-YC hg19

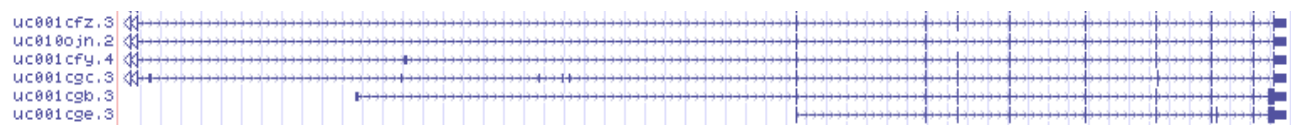

Supplementary Figure 3: Expression of genes hallmarks for each subtype.

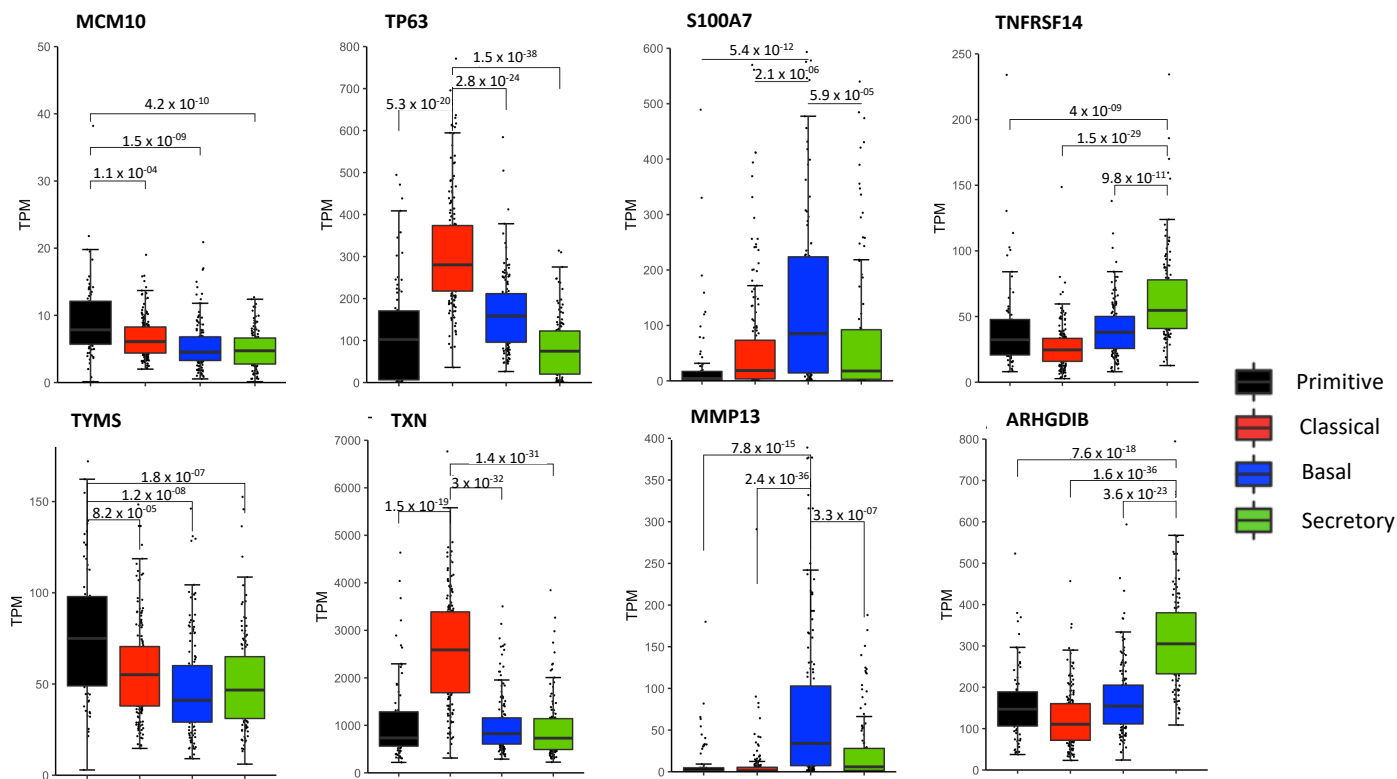

Supplementary Figure 4: Global NF-YA expression levels in LUSC subtypes. A. Comparison of relative NF-YA global levels in LUSC subtypes in microarray data. B. Global NF-YA levels in TCGA LUSC subtypes according to RNA-Seq data.

A

|      | adj.P.Val                | P.Value                  | t          | B        | log2FoldChange | SUBTYPE VS OTHERS |
|------|--------------------------|--------------------------|------------|----------|----------------|-------------------|
| NFYA | 0.8959                   | 4.95 x 10 <sup>-01</sup> | -0.695069  | -5.10996 | -0.7527895     | CLASSICAL         |
| NFYA | 0.8270491                | 6.32 x 10 <sup>-01</sup> | -0.4864997 | -5.63337 | -0.4043451     | SECRETORY         |
| NFYA | 1.15 x 10 <sup>-01</sup> | 1.15 x 10 <sup>-01</sup> | -1.6015297 | -4.6244  | -0.2803957     | BASAL             |
| NFYA | 8.89 x 10 <sup>-01</sup> | 7.82 x 10 <sup>-01</sup> | 0.28083    | -5.92554 | 0.23337        | PRIMITIVE         |

B

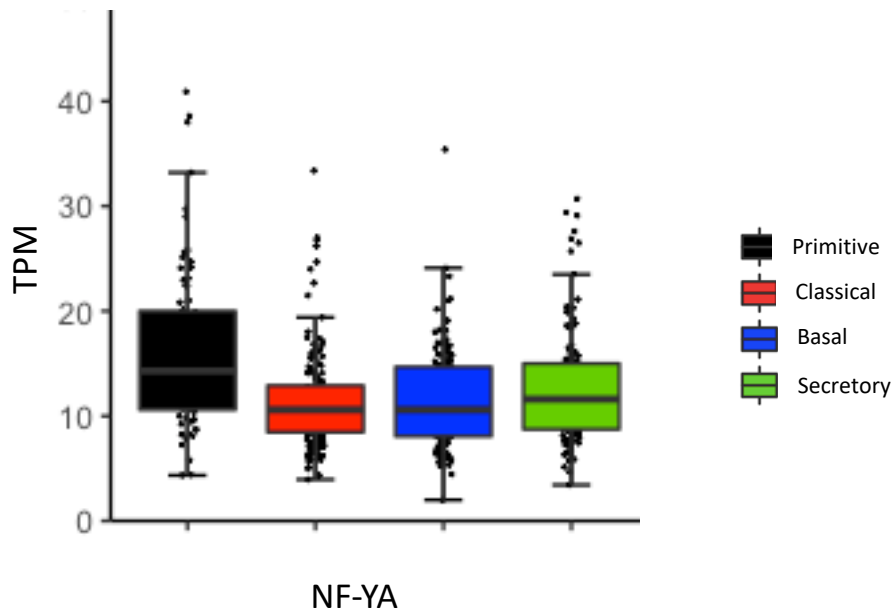

Supplementary Figure 5: KOBAS analysis of commonly up-regulated genes in LUSC subtypes.

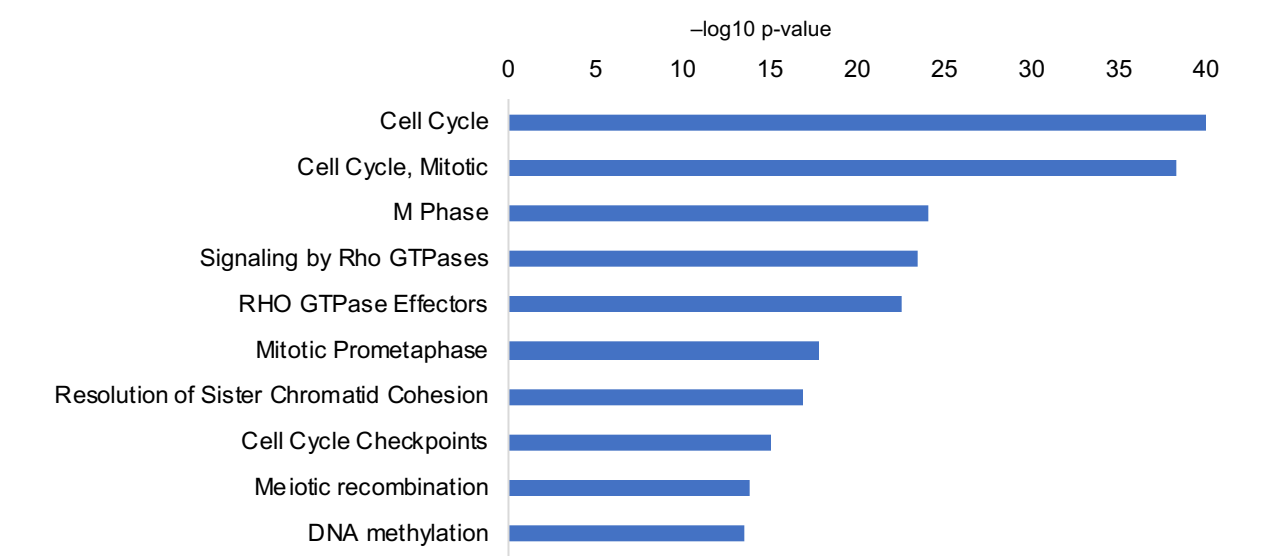

Supplementary Figure 6: Analysis of commonly down-regulated genes in LUSC subtypes. A.Venn diagrams B. Pscan analysis of promoter sequences of commonly downregulated genes in all LUSC subtypes C. KOBAS analysis of commonly downregulated genes in all LUSC subtypes.

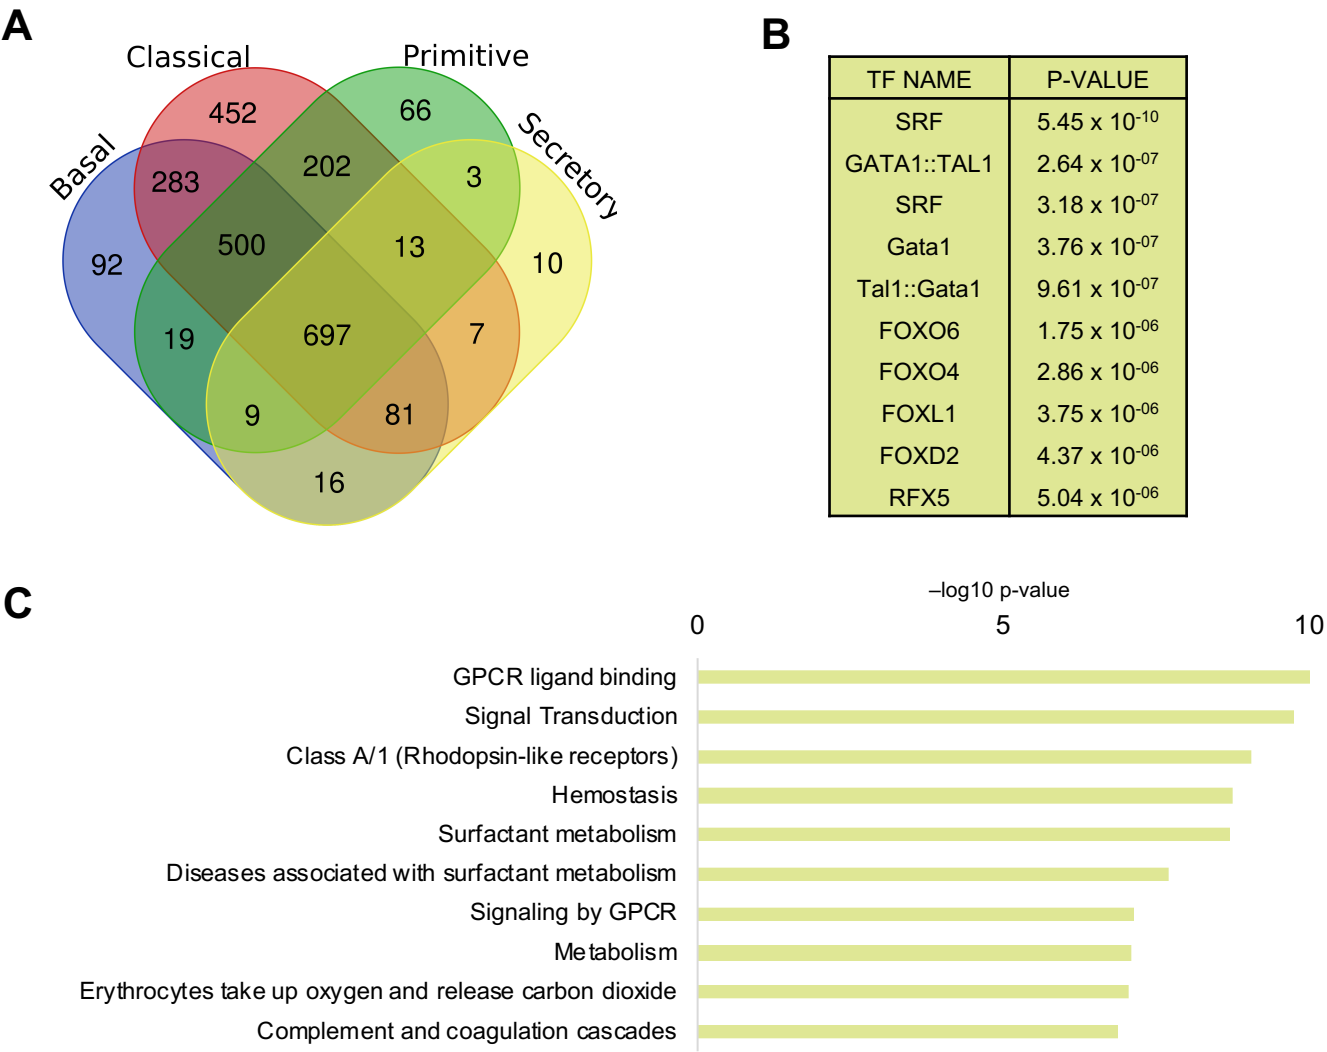

Supplement: s1 [file s1]
